# Supplementary material for: G Protein Coupled Receptors in Embryonic Stem Cells: A Role for Gs-Alpha Signaling
Source: PLoS One. 2010 Feb 8;5(2):e9105. doi: 10.1371/journal.pone.0009105 (PMC2816999; doi:10.1371/journal.pone.0009105)
Supplement: Text S2 — Raw expression data for the GPCR genes in the array. (0.07 MB XLS) [file pone.0009105.s003.xls]

## Sheet: Sheet1
Day4	Ct	Ct	Day20	Ct	Ct	ES	Ct	Ct
Fzd8	24.959	26.0729	Adcyap1r1	23.934	23.9515	Gpr17	40	40
Agtr1a	40	40	Admr	40	40	Admr	40	40
Fzd6	26.9476	29.144	Adora1	26.9677	26.5805	Adora1	40	40
Gpr1	31.0033	34.1025	Adora2a	31.6831	31.9846	Adora2a	40	40
Gpr92	29.9371	32.9047	Adora2b	30.6233	29.9485	Adora3	40	40
Gpr27	40	40	Adora3	40	40	Adra1a	40	40
Nmur2	40	40	Adra1a	40	40	Adra2a	40	40
Oprd1	30.9711	33.8943	Adra1b	31.9691	30.759	Adra2b	40	40
Drd5	33.9808	35.8464	Adra1d	34.289	33.9775	Adrb2	40	40
Gprc5b	28.9154	28.9782	Adra2a	27.9717	28.4512	Agtr1a	40	40
Chrm5	31.9681	33.5431	Adra2b	31.993	31.7761	Agtr1b	40	40
Hrh4	32.2753	36.5341	Adra2c	33.4593	32.9265	Agtr2	40	40
Celsr3	29.9942	32.1646	Adrb1	29.8904	29.9378	Agtrl1	40	40
Gpr18	32.82	34.53	Adrb2	32.957	32.1204	Avpr1a	40	40
Avpr2	40	40	Adrb3	40	40	Avpr1b	40	40
Rrh	40	40	Agtr1a	40	40	Avpr2	40	40
Mrgprf	40	40	Agtr1b	40	40	Bdkrb1	40	40
F2rl3	36.9477	36.9149	Agtr2	35.9679	35.9258	Bdkrb2	40	40
Gpr87	33.9284	35.5915	Agtrl1	32.8	34.9467	Blr1	40	40
Gpr175	35.9632	40	Avpr1a	36.9831	36.0946	C3ar1	40	40
Grm2	33.9789	35.4414	Avpr1b	33.6998	33.9255	C5ar1	40	40
Gpr141	35.9772	40	Avpr2	36.3283	36.8083	Calcr	40	40
C5ar1	40	40	Bdkrb1	40	40	Calcrl	40	40
Calcr	40	40	Bdkrb2	40	40	Casr	40	40
Ccr1	35.944	35.1789	Blr1	33.9214	35.9832	Cckar	40	40
Cckbr	40	40	C3ar1	40	40	Cckbr	40	40
Ccr4	40	40	C5ar1	40	40	Ccr1	40	40
Ccr6	40	40	Calcr	40	40	Ccr10	40	40
Chrm2	34.9841	36.9423	Calcrl	34.9669	35.8246	Ccr2	40	40
Avpr1b	34.9202	40	Casr	35.1215	37.0013	Ccr3	40	40
Adra1d	34.6006	35.9716	Cckar	34.4773	34.9376	Ccr5	40	40
Ccr7	40	40	Cckbr	40	40	Ccr6	40	40
Hcrtr1	36.02	34.9399	Ccr1	37.0477	32.8096	Ccr7	40	40
Avpr1a	35.9976	40	Ccr10	37.0187	36.1275	Ccr8	40	40
Gpr116	33.9516	36.2775	Ccr2	35.1812	33.938	Ccr9	40	40
Gpr39	34.9952	35.3182	Ccr3	32.1415	36.9992	Ccrl1	40	40
Ccr9	40	40	Ccr4	40	40	Ccrl2	40	40
Calcrl	33.9687	33.5251	Ccr5	33.0254	32.3088	Chrm1	40	40
Ccrl1	40	40	Ccr6	40	40	Chrm2	40	40
Ccrl2	40	40	Ccr7	40	40	Chrm3	40	40
Taar1	36.1092	40	Ccr8	37.0183	36.1584	Cmkor1	40	40
Chrm3	40	40	Ccr9	40	40	Cnr2	40	40
Cnr1	40	40	Ccrl1	40	40	Crhr1	40	40
Crcp	40	40	Ccrl2	40	40	Crhr2	40	40
Oprm1	36.5658	37.019	Cd97	35.9735	35.8194	Cx3cr1	40	40
Agtr1b	40	40	Celsr1	35.0501	40	Cxcr3	40	40
Edg6	29.91	27.57	Celsr2	27.9743	27.8418	Cxcr4	40	40
Crhr1	26.9696	27.5032	Celsr3	24.9809	24.858	Cxcr6	40	40
Gpr137b	28.9692	29.4076	Chrm1	27.9909	28.9441	Cysltr1	40	40
Mc1r	34.4394	36.9535	Chrm2	34.4527	35.9425	Cysltr2	40	40
Crhr2	40	40	Chrm3	40	40	Darc	40	40
Gpr75	31.954	32.0415	Chrm4	30.9856	30.5655	Drd1a	40	40
Gpr85	34.9432	33.895	Chrm5	33.6295	32.9959	Drd2	40	40
Cckar	35.9626	33.7235	Cmklr1	33.9578	34.1467	Drd3	40	40
Agtrl1	36.9744	35.2271	Cmkor1	37.1026	34.0007	Drd5	40	40
Cx3cr1	40	40	Cnr1	40	40	Edg1	40	40
F2rl2	28.9667	27.9466	Cnr2	26.9533	27.0928	Edg3	40	40
Cxcr4	40	40	Crcp	40	40	Edg8	40	40
F2rl1	26.9897	27.613	Crhr1	25.1547	24.9825	Emr1	40	40
Cysltr2	40	40	Crhr2	40	40	Emr4	40	40
Darc	40	40	Cx3cr1	40	40	F2rl2	40	40
Sstr1	35.9499	40	Cxcr3	35.9969	36.9993	F2rl3	40	40
Drd1a	40	40	Cxcr4	40	40	Ffar1	40	40
P2ry14	36.6618	36.9404	Cxcr6	35.94	35.9	Ffar2	40	40
Gpr22	40	40	Cysltr1	35.9275	40	Fpr-rs2	40	40
Drd2	40	40	Cysltr2	40	40	Fpr-rs3	40	40
Agtr2	40	40	Darc	40	40	Fpr-rs4	40	40
Ebi2	40	40	Drd1a	40	40	Fpr-rs6	40	40
Edg2	40	40	Drd2	40	40	Fpr-rs7	40	40
Gpr62	30.9644	32.3667	Drd3	30.9446	30.3024	Fpr1-	40	40
Grm3	36.9461	40	Drd4	36.7056	36.9896	Fprl1	40	40
Taar9	40	34.2355	Drd5	36.0049	35.975	Fshr	40	40
Edg4	40	40	Ebi2	40	40	Fzd9	40	40
Ccr8	33.9752	33.2482	Edg1	30.9952	33.9243	Gabbr2	40	40
Ednra	40	40	Edg2	40	40	Galr1	40	40
Gpr45	30.966	31.7398	Edg3	29.9512	30.1738	Galr3	40	40
Emr4	40	40	Edg4	40	40	Gcgr	40	40
Rxfp4	35.9882	35.7977	Edg5	36.0111	34.5351	Ghrhr	40	40
Gpr44	40	40	Edg6	40	40	Ghsr	40	40
Gpr119	40	40	Edg7	40	40	Gipr	40	40
P2ry6	33.9309	35.5968	Edg8	34.7805	32.9681	Glp2r	40	40
F2r	40	40	Ednra	40	40	Gnrhr	40	40
Htr4	40	40	Ednrb	40	40	Gpr1	40	40
Gpr123	28.9693	30.6758	Eltd1	28.8821	29.3108	Gpr101	40	40
Gpr160	38	35.6738	Emr1	34.9542	36.9361	Gpr103	40	40
Ffar1	40	40	Emr4	40	40	Gpr109a	40	40
Fpr1	40	40	F2r	40	40	Gpr111	40	40
Lphn1	25.9458	28.8682	F2rl1	25.9788	25.951	Gpr112	40	40
Gpr101	35.9266	40	F2rl2	36.9777	35.7306	Gpr113	40	40
Gpr33	36.995	37.098	F2rl3	35.9562	35.9655	Gpr115	40	40
Fprl1	40	40	Ffar1	40	40	Gpr116	40	40
Ccr10	40	40	Ffar2	40	40	Gpr119	40	40
Fpr-rs4	40	40	Fpr1	40	40	Gpr12	40	40
Fpr-rs6	40	40	Fprl1	40	40	Gpr120	40	40
Sstr4	40	34.9535	Fpr-rs2	35.3587	37.0975	Gpr123	40	40
Drd4	35.9346	40	Fpr-rs3	35.8033	36.9293	Gpr128	40	40
Fpr-rs7	40	40	Fpr-rs4	40	40	Gpr132	40	40
Frzb	40	40	Fpr-rs6	40	40	Gpr133	40	40
Fzd1	40	40	Fpr-rs7	40	40	Gpr139	40	40
Galr2	40	40	Frzb	40	40	Gpr141	40	40
Gabbr2	26.945	29.729	Fshr	26.93	26.9218	Gpr142	40	40
Gcgr	40	40	Fzd1	40	40	Gpr143	40	40
Edg3	29.9497	30.112	Fzd10	28.9578	29.7561	Gpr15	40	40
Fzd3	27.9672	29.2423	Fzd2	27.0031	27.7402	Gpr150	40	40
Fzd4	28.9735	29.4461	Fzd3	28.9348	28.3788	Gpr152	40	40
Fzd9	27.9714	29.3479	Fzd4	26.9984	27.9502	Gpr154	40	40
Eltd1	35.9636	32.0836	Fzd5	32.9471	33.0155	Gpr156	40	40
Gpr4	37.0283	35.7192	Fzd6	35.9667	35.7231	Gpr160	40	40
Gpr26	32.9464	29.8718	Fzd7	30.3246	29.9844	Gpr171	40	40
Lgr4	27.913	28.1134	Fzd8	26.9379	25.9503	Gpr173	40	40
Gprc5a	29.9461	28.69	Fzd9	28.98	28.9768	Gpr174	40	40
Fpr-rs3	36.7344	34.0412	Gabbr1	35.0016	34.7306	Gpr18	40	40
Smo	26.975	27.4702	Gabbr2	24.7595	24.9794	Gpr19	40	40
Fzd7	27.9174	28.9108	Galr1	26.9748	26.9795	Gpr21	40	40
Ghsr	40	40	Galr2	40	40	Gpr22	40	40
Fshr	34.9662	31.3493	Galr3	31.9474	32.3932	Gpr23	40	40
Gnrhr	40	40	Gcgr	40	40	Gpr26	40	40
Bdkrb1	40	40	Ghrhr	40	40	Gpr27	40	40
Gpbar1	40	40	Ghsr	40	40	Gpr33	40	40
Adrb1	33.0637	34.7947	Gipr	32.9605	32.92	Gpr34	40	40
Htr5b	33.9793	35.0951	Glp1r	32.9762	33.9773	Gpr35	40	40
Tacr2	35.039	35.6684	Glp2r	34.9657	34.7036	Gpr41	40	40
Gpr109a	40	40	Gnrhr	40	40	Gpr45	40	40
Gpr111	40	40	Gpbar1	40	40	Gpr50	40	40
Gpr83	34.9446	33.9907	Gpr1	32.8779	33.9926	Gpr55	40	40
Sstr2	34.8368	37.0919	Gpr101	35.999	34.8555	Gpr56	40	40
Tacr1	36.9835	40	Gpr103	36.7747	36.9866	Gpr6	40	40
Npffr1	36.9947	40	Gpr108	36.9697	36.9962	Gpr61-	40	40
Gpr112	40	40	Gpr109a	40	40	Gpr64	40	40
Edg7	40	40	Gpr111	40	40	Gpr65	40	40
Gpr115	40	40	Gpr112	40	40	Gpr82-	40	40
Galr1	40	36.9181	Gpr113	36.972	36.5897	Gpr84	40	40
Gpr149	34.8927	36.975	Gpr114	34.715	35.9561	Gpr85	40	40
Gpr125	40	40	Gpr115	40	40	Gpr87	40	40
Oprl1	34.9261	34.0003	Gpr116	32.9766	33.8387	Gpr88	40	40
Gpr128	40	40	Gpr119	40	40	Gpr97	40	40
Gpr114	35.9721	36.803	Gpr12	35.7852	35.9485	Gprc5d	40	40
Sstr3	30.4357	34.5521	Gpr120	31.9729	31.5411	Gprc6a	40	40
Adra1b	29.1066	36.7144	Gpr123	31.9692	31.9998	Grm2	40	40
Gpr108	30.9862	30.4051	Gpr124	29.2156	29.9986	Grm3	40	40
Gpr132	40	40	Gpr125	40	40	Grm5	40	40
Gpr137	40	40	Gpr128	40	40	Grm7	40	40
Gpr142	40	40	Gpr132	40	40	Grm8	40	40
Mchr1	40	37.0068	Gpr133	36.9766	37.0301	Hcrtr1	40	40
Tacr3	35.9709	36.3685	Gpr135	35.9467	35.5184	Hcrtr2	40	40
Gpr15	40	40	Gpr137	40	40	Hrh1	40	40
Adora2b	30.9675	32.6244	Gpr137b	30.4222	30.9422	Hrh2	40	40
Adra2c	31.993	34.5649	Gpr139	31.9403	32.5787	Hrh3	40	40
Pthr2	35.6314	37.0157	Gpr141	35.6939	35.932	Hrh4	40	40
Gpr150	40	40	Gpr142	40	40	Htr1a	40	40
Gpr12	35.8493	40	Gpr143	35.6603	36.9604	Htr1d	40	40
Cmklr1	40	40	Gpr146	40	40	Htr1f	40	40
Tshr	34.937	34.3295	Gpr149	33.9668	33.4158	Htr2c	40	40
Gpr151	40	40	Gpr15	40	40	Htr4	40	40
Gpr153	40	40	Gpr150	40	40	Htr5a	40	40
Gpr156	40	40	Gpr151	40	40	Htr6	40	40
Gpr23	30.9504	33.5523	Gpr152	30.9624	31.495	Htr7	40	40
Gpr171	40	40	Gpr153	40	40	Lgr5	40	40
Gpr174	31.9959	32.4726	Gpr154	30.9798	31.2867	Lgr7	40	40
Gpr173	40	40	Gpr156	40	40	Lgr8	40	40
Gpr55	37.0314	40	Gpr160	34.8391	40	Lhcgr	40	40
Hrh3	33.981	35.527	Gpr161	33.7097	33.9876	Ltb4r1	40	40
Gprc5c	28.9575	28.489	Gpr162	27.9563	27.4752	Mas1	40	40
Lhcgr	40	40	Gpr17	36.9978	40	Mass1	40	40
Gpr176	40	40	Gpr171	40	40	Mc2r	40	40
Gpr21	40	40	Gpr173	40	40	Mc3r	40	40
Lgr5	34.9265	34.6064	Gpr174	33.9427	33.8914	Mc4r	40	40
Chrm4	33.965	33.7174	Gpr175	33.0075	32.7918	Mc5r	40	40
Gpr3	40	40	Gpr176	40	40	Mchr1	40	40
Gpr30	40	40	Gpr18	40	40	Mrgpra1	40	40
Bdkrb2	40	40	Gpr19	40	40	Mrgpra2	40	40
Ptger3	35.9815	33.3485	Gpr20	33.9566	33.518	Mrgpra3	40	40
Gpr34	40	40	Gpr21	40	40	Mrgpra4	40	40
Htr2a	33.9733	34.3167	Gpr22	32.9568	33.2498	Mrgpra5	40	40
Vipr2	32.9317	32.9847	Gpr23	31.9267	32.3035	Mrgpra6	40	40
Tm7sf3	27.9542	29.7664	Gpr26	28.0017	27.9272	Mrgpra7	40	40
Gpr63	40	40	Gpr27	40	40	Mrgpra8	40	40
Gpr64	40	40	Gpr3	40	40	Mrgprb1	40	40
Gpr81	40	40	Gpr30	40	40	Mrgprb2	40	40
Cd97	36.9705	33.9153	Gpr33	32.7092	37.104	Mrgprb3	40	40
Gpr84	40	40	Gpr34	40	40	Mrgprb4	40	40
Gpr17	37.0015	35.1042	Gpr35	35.8932	35.0964	Mrgprb5	40	40
Kiss1r	32.9932	34.3534	Gpr39	32.2521	32.8221	Mrgprd	40	40
C3ar1	40	40	Gpr4	40	40	Mrgpre	40	40
Hrh2	33.4985	36.9324	Gpr41	33.9888	35.2647	Mrgprf	40	40
Gpr162	31.8336	32.9742	Gpr44	30.9742	31.6563	Mrgprg	40	40
Gpr61	31.9651	34.6518	Gpr45	31.9693	32.606	Mrgprx2	40	40
Gpr19	36.9209	35.2981	Gpr50	35.2562	35.973	Mtnr1a	40	40
Mrgpre	35.9803	35.5432	Gpr55	34.49	35.9721	Mtnr1b	40	40
Htr2b	33.9902	36.9417	Gpr56	33.9661	35.8767	Nmur1	40	40
Lphn3	33.9675	32.9579	Gpr6	31.9566	32.6668	Nmur2	40	40
Adra2b	30.9768	32.3201	Gpr61	29.9715	30.8744	Npbwr1	40	40
Ccr3	29.7191	30.1697	Gpr62	28.9484	29.3238	Npffr1	40	40
Gpr88	40	40	Gpr63	40	40	Npffr2	40	40
Gpr97	40	40	Gpr64	40	40	Npy1r	40	40
Grm8	40	36.9702	Gpr65	37.0096	36.7206	Npy2r	40	40
Adora2a	34.0162	35.8964	Gpr68	34.7985	33.9449	Npy5r	40	40
Drd3	34.9662	34.713	Gpr75	32.9854	34.9815	Npy6r	40	40
Gpr113	35.9737	35.8253	Gpr77	35.9633	34.6171	Ntsr1	40	40
Gprc5d	40	40	Gpr81	40	40	Ntsr2	40	40
Lgr6	32.8741	36.9704	Gpr82	32.3827	35.9237	Opn5	40	40
Mas1	35.9237	35.5984	Gpr83	35.5069	34.9418	Oprd1	40	40
Gprc6a	40	40	Gpr84	40	40	Oprk1	40	40
Edg1	31.9237	33.7034	Gpr85	31.9709	31.9559	Oprm1	40	40
Grm4	32.9809	33.4266	Gpr87	30.9309	33.4651	Oxgr1	40	40
Grm1	40	40	Gpr88	40	40	Oxtr	40	40
Ptger4	32.9651	32.6332	Gpr92	31.8189	31.9699	P2ry1	40	40
Grm7	40	40	Gpr97	40	40	P2ry10	40	40
Tbxa2r	31.9665	32.7095	Gprc5a	31.6258	30.9925	P2ry12	40	40
Leng4	27.9733	28.6024	Gprc5b	26.9499	26.6669	P2ry14	40	40
Gpr161	31.9695	31.5132	Gprc5c	30.9566	30.313	P2ry2	40	40
Hcrtr2	40	40	Gprc5d	40	40	P2ry4	40	40
Htr1a	40	40	Gprc6a	40	40	P2ry6	40	40
Htr1d	40	40	Grm1	40	40	Ppyr1	40	40
Gpr135	32.8913	33.9318	Grm2	31.9594	32.6463	Prlhr	40	40
Htr1b	30.9972	33.3594	Grm3	30.9547	30.9557	Prokr2	40	40
Gpr133	29.2544	28.5274	Grm4	27.9726	28.0263	Ptafr	40	40
Cxcr6	31.54	30.94	Grm5	30.0822	29.9203	Ptgdr	40	40
Gpr77	36.9613	35.0946	Grm6	35.0022	35.9874	Ptger1	40	40
Htr1f	40	40	Grm7	40	40	Ptger2	40	40
Chrm1	29.9739	31.6171	Grm8	29.4735	29.9481	Ptger3	40	40
Gpr35	34.9411	34.1332	Hcrtr1	33.9608	32.9399	Ptgfr	40	40
Htr5a	40	40	Hcrtr2	40	40	Ptgir	40	40
Gpr6	33.0014	33.934	Hrh1	32.6854	31.9614	Pthr2	40	40
Gpr120	32.9943	34.6399	Hrh2	32.47	32.9724	Rrh	40	40
Mass1	32.9242	31.5938	Hrh3	31.5065	30.968	Rxfp3	40	40
Cxcr3	35.9522	40	Hrh4	37.0611	35.9622	Sstr1	40	40
Htr7	40	40	Htr1a	40	40	Sstr2	40	40
Ltb4r2	29.9558	32.9537	Htr1b	30.6312	29.9721	Sstr3	40	40
Lgr7	40	40	Htr1d	40	40	Sstr4	40	40
Lgr8	40	40	Htr1f	40	40	Sstr5	40	40
Adcyap1r1	31.9343	32.19	Htr2a	30.694	30.9279	Sucnr1	40	40
Ccr2	34.8928	40	Htr2b	35.0813	36.9251	Taar1	40	40
Gpr146	34.9931	35.1017	Htr2c	33.9815	35.0608	Taar9	40	40
Ptgdr	35.0472	35.8118	Htr4	34.9524	34.842	Tacr1	40	40
Ltb4r1	40	40	Htr5a	40	40	Tacr3	40	40
Mc5r	34.2029	35.9611	Htr5b	34.972	34.1257	Trhr	40	40
Glp1r	35.9645	35.968	Htr6	35.8923	35.003	Tshr	40	40
Mc2r	40	40	Htr7	40	40	Vipr1	40	40
Edg8	32.9648	30.8035	Kiss1r	30.9629	30.5309	Vipr2	40	40
Celsr2	27.9461	30.4878	Leng4	28.9682	28.3798	Xcr1	40	40
Fzd5	30.9906	31.8118	Lgr4	30.1989	29.9315	Gpr176	37.184	40
Fzd2	29.9878	31.6965	Lgr5	29.0173	30.4956	Gpr62	37.174	40
Sstr5	32.959	34.9984	Lgr6	32.9632	32.9267	Ednrb	40	37.079
Mc3r	40	40	Lgr7	40	40	Cmklr1	40	36.986
Mrgpra1	40	40	Lgr8	40	40	Eltd1	40	36.977
Gpr154	35.9296	36.0083	Lhcgr	35.9561	34.9485	P2ry13	36.974	40
P2ry5	25.9207	27.1026	Lphn1	24.6864	24.9407	Gpr77	40	36.964
Celsr1	29.9579	30.7854	Lphn2	28.9577	29.9772	Gpr30	36.962	40
Edg5	28.9732	28.2971	Lphn3	26.9615	27.8496	Ptger4	36.961	40
Mrgpra2	40	40	Ltb4r1	40	40	Gpr75	40	36.959
Prokr1	33.9564	33.7583	Ltb4r2	32.9701	32.8577	Gpr83	40	36.959
Mtnr1a	34.6955	37.0601	Mas1	33.5876	36.9526	Oprl1	36.959	40
Grm6	34.9868	40	Mass1	35.6186	36.9867	Tbxa2r	40	36.959
Gpr68	33.6606	35.8511	Mc1r	32.9782	34.7288	Adra2c	36.958	40
Mrgpra3	40	40	Mc2r	40	40	Gpr3	36.956	40
Mrgpra4	40	40	Mc3r	40	40	Rxfp4	36.956	40
Cnr2	29.973	31.2632	Mc4r	28.9566	30.1674	Lphn3	40	36.954
Ffar2	36.9461	36.7212	Mc5r	35.969	35.9066	Grm1	40	36.952
Ppyr1	31.9437	34.3125	Mchr1	31.9486	32.2941	Chrm5	40	36.951
Mrgpra5	40	40	Mrgpra1	40	40	Kiss1r	40	36.951
Mrgpra6	40	40	Mrgpra2	40	40	Edg6	40	36.95
Mrgpra7	40	40	Mrgpra3	40	40	Drd4	40	36.949
Mrgpra8	40	40	Mrgpra4	40	40	Prokr1	36.948	40
Mrgprb1	40	40	Mrgpra5	40	40	Gpr39	36.943	40
Mrgprb2	40	40	Mrgpra6	40	40	Ednra	40	36.936
Mrgprb3	40	40	Mrgpra7	40	40	Adra1b	36.929	40
Mrgprb4	40	40	Mrgpra8	40	40	Gpr151	40	36.921
Mrgprb5	40	40	Mrgprb1	40	40	Tacr2	35.977	40
Mrgprd	40	40	Mrgprb2	40	40	Adrb1	40	35.973
Mrgprg	40	40	Mrgprb3	40	40	Fzd4	40	35.958
Mrgprx2	40	40	Mrgprb4	40	40	Htr5b	40	35.954
Mtnr1b	40	40	Mrgprb5	40	40	Adcyap1r1	40	35.935
Npbwr1	40	40	Mrgprd	40	40	Gpr137b	40	35.933
Cysltr1	36.9967	35.331	Mrgpre	35.3461	35.9695	Glp1r	40	35.931
Fpr-rs2	35.9365	40	Mrgprf	35.9319	36.8713	Htr2b	40	35.931
Npy2r	40	40	Mrgprg	40	40	Gpr146	40	35.918
Npy5r	40	40	Mrgprx2	40	40	Edg7	38	36.948
Nmur1	35.9406	40	Mtnr1a	35.9385	36.9776	Gpr68	37.053	36.998
Npy6r	40	40	Mtnr1b	40	40	Gpr175	37.003	37.034
Gpr65	35.2038	36.9645	Nmur1	35.1416	35.9557	Grm4	36.975	36.97
Grm5	40	36.9432	Nmur2	36.9495	36.704	Fzd6	40	33.943
Ntsr1	40	40	Npbwr1	40	40	Ebi2	36.818	36.964
Cmkor1	35.9745	33.5075	Npffr1	33.9672	33.7017	Frzb	36.812	36.955
Emr1	36.9352	35.3286	Npffr2	35.3578	35.9449	Gpr135	35.95	37.442
Gpr50	40	40	Npy1r	37.2728	40	Gpr114	36.268	36.943
Ntsr2	40	40	Npy2r	40	40	Gpr44	35.959	36.992
Opn5	40	40	Npy5r	40	40	Chrm4	36.975	35.966
Oxgr1	40	40	Npy6r	40	40	Gpr161	36.946	35.986
Oxtr	40	40	Ntsr1	40	40	Fzd2	36.965	35.959
P2ry1	40	40	Ntsr2	40	40	Adra1d	36.957	35.956
P2ry10	40	40	Opn5	40	40	Gpr20	36.961	35.951
Adrb2	31.9474	35.0686	Oprd1	32.9776	31.8549	Gpr149	36.961	35.95
Gpr143	33.9417	36.5622	Oprk1	33.4219	35.9572	Grm6	35.942	36.962
Ednrb	32.25	33.65	Oprl1	32.0586	31.9247	Gpr63	36.952	35.951
Gpr56	35.995	33.1193	Oprm1	33.944	33.3819	Edg2	36.94	35.944
P2ry13	40	40	Oxgr1	40	40	Gpr81	35.881	36.984
P2ry2	40	40	Oxtr	40	40	Gprc5a	36.984	34.967
P2ry4	40	40	P2ry1	40	40	Cnr1	35.951	35.991
Ptafr	40	40	P2ry10	40	40	Gpr153	35.956	35.969
Htr6	33.9744	36.7304	P2ry12	33.6404	35.9651	Adrb3	35.964	35.957
Ptger1	40	40	P2ry13	40	40	Galr2	35.953	35.955
Gpr82	34.9569	35.1354	P2ry14	33.9175	35.0557	Gpr4	35.951	35.956
Ptger2	40	40	P2ry2	40	40	Htr2a	35.954	35.769
Ptgfr	40	40	P2ry4	40	40	Lgr6	35.37	36.002
Fzd10	27.9684	29.0877	P2ry5	26.9558	27.7569	Htr1b	35.984	34.981
Npy1r	36.8974	40	P2ry6	36.9392	36.3415	Gpr108	35.981	34.974
Gpr103	40	29.9713	Ppyr1	33.926	34.9413	Ccr4	35.984	34.967
Npffr2	36.3202	36.9756	Prlhr	35.7768	35.9895	Gpbar1	34.973	35.975
Blr1	32.9163	35.9378	Prokr1	33.0111	33.6812	Gprc5c	35.968	34.974
Casr	35.0228	34.8412	Prokr2	33.9376	34.6642	Gpr92	35.961	34.979
Ptgir	40	40	Ptafr	40	40	Adora2b	35.967	34.956
Htr2c	36.9656	40	Ptgdr	36.9305	36.7779	Fzd1	35.95	34.973
Rxfp3	40	40	Ptger1	40	40	Edg5	35.966	34.951
Sucnr1	40	40	Ptger2	40	40	Gprc5b	35.936	34.935
Oprk1	36.9656	36.9827	Ptger3	35.9541	35.9499	Gpr162	34.662	35.935
Glp2r	31.961	33.3853	Ptger4	31.7257	31.963	Mc1r	36.949	33.645
Trhr	40	40	Ptgfr	40	40	Celsr3	34.977	34.978
Vipr1	40	40	Ptgir	40	40	Gpr124	34.954	34.942
Gpr124	27.957	27.9611	Pthr1	26.9917	25.1393	Fzd3	34.939	34.951
Ghrhr	36.9375	33.7449	Pthr2	34.94	34.6641	Fzd8	34.979	33.993
Prlhr	35.9604	40	Rrh	35.992	37.0507	Ltb4r2	35.986	32.97
Xcr1	40	40	Rxfp3	40	40	Gpr137	33.972	34.97
Prokr2	35.9195	35.7052	Rxfp4	34.5377	35.9535	Pthr1	34.964	33.959
Pthr1	29.0041	27.0375	Smo	26.976	26.2948	Celsr2m1	34.95	33.963
Lphn2	28.9024	28.2776	Sstr1	27.9592	26.7786	Lphn2	34.931	33.926
Gabbr1	33.95	35.4436	Sstr2	33.9713	33.6269	Edg4	33.987	33.983
Mc4r	40	35.9597	Sstr3	36.0177	37.011	Gpr125	33.972	33.976
Gipr	35.9159	40	Sstr4	35.6449	36.9771	Fzd10	33.952	33.97
Adora1	33.9575	30.9142	Sstr5	32.0385	31.3728	Lgr4	33.919	33.937
Admr	40	40	Sucnr1	40	40	Leng4	33.957	32.972
Galr3	31.9569	33.1215	Taar1	31.9384	31.5811	Smo	33.25	32.96
Gpr139	40	40	Taar9	35.2834	40	Cd97	32.982	32.995
Gpr20	30.9492	33.2686	Tacr1	30.7359	30.9326	F2r	33.967	31.994
P2ry12	35.9433	40	Tacr2	36.933	36.0282	Celsr1	32.967	32.985
Ccr5	29.9565	32.3749	Tacr3	29.9631	29.9448	F2rl1	33.968	31.964
Hrh1	34.9712	35.639	Tbxa2r	35.5617	33.926	Gabbr1	32.966	31.951
Gpr152	29.9298	32.215	Tm7sf3	29.7488	29.907	Tm7sf3	32.963	31.933
Adora3	40	40	Trhr	40	40	Fzd5	31.987	31.987
Gpr41	32.9785	35.981	Tshr	32.9936	33.8921	Lphn1	31.962	31.962
Adra1a	40	40	Vipr1	40	40	P2ry5	31.947	31.97
Adra2a	32.9378	33.2926	Vipr2	31.955	32.2871	Crcp	31.962	31.947
Adrb3	40	40	Xcr1	40	40	Fzd7	30.974	29.96
